# Supplementary material for: Systematic Exploration of Birth Season-Associated Pediatric Diseases in Hangzhou, China: A Retrospective Observational Study
Source: Research Square preprint supplement (doi:10.21203/rs.3.rs-7212492/v1), 2025-09-08
Supplement: Supplementary file 1 [file d4d8a43266a26a4830d7a3d5.docx]

**Supplemental Material**

**Table of Contents**

**Supplemental Table S1** Summary statistics of pediatric patients in Hangzhou from 2014 to 2020 2

**Supplemental Table S2** The type of diseases in this study 3

**Supplemental** **Table S3** The SOB-associated diseases in previous studies 4

**Supplemental Fig. S1** The distribution of the number of patients visits. a. the distribution of patient visits in different types of diseases with ICD-10 by SOBs. b. complete number of visits in different type of diseases with ICD-10 by sex 5

**Table S1.** Summary statistics of pediatric patients in Hangzhou from 2014 to 2020

| Characteristic | n (%) |
| --- | --- |
| SOB (n=3,480,838) |  |
| Spring (March-May) | 800,700 (23.00%) |
| Summer (June-April) | 859,294 (24.70%) |
| Autumn (September-November) | 938,947 (26.94%) |
| Winter (December-February) | 881,897 (25.34%) |
| Sex (n=3,480,514) |  |
| Girls | 1,496,409 (42.99%) |
| Boys | 1,984,105 (57.01%) |

**Table S2** The type of diseases in this study

| ICD-10 | The type of disease |
| --- | --- |
| A00-B99 | Certain infectious and parasitic diseases |
| C00-D48 | Neoplasms |
| D50-D89 | Diseases of the blood and blood−forming organs and certain disorders involving the immune mechanism |
| E00-E90 | Endocrine, nutritional and metabolic diseases |
| F00-F99 | Mental and behavioral disorders |
| G00-G99 | Diseases of the nervous system |
| H00-H59 | Diseases of the eye and adnexa |
| H60-H99 | Diseases of the ear and mastoid process |
| I00-I99 | Diseases of the circulatory system |
| J00-J99 | Diseases of the respiratory system |
| K00-K93 | Diseases of the digestive system |
| L00-L99 | Diseases of the skin and subcutaneous tissue |
| M00-M99 | Diseases of the musculoskeletal system and connective tissue |
| N00-N99 | Diseases of the genitourinary system |
| O00-O99 | Pregnancy, childbirth and the puerperium |
| P00-P96 | Certain conditions originating in the perinatal period |
| Q00-Q99 | Congenital malformations, deformations and chromosomal abnormalities |
| R00-R99 | Symptoms, signs and abnormal clinical and laboratory findings, not elsewhere classified |
| S00-T98 | Injury, poisoning and certain other consequences of external causes |
| V01-Y98 | External causes of morbidity and mortality |
| Z00-Z99 | Factors influencing health status and contact with health services |

Note: Diseases in this study were divided into 21 groups by International Classification of Diseases, version 10 (ICD-10) codes

**Table S3** The SOB-associated diseases in previous studies

| Disease | SOB with highest risk | Previous studies |
| --- | --- | --- |
| Consistent with our result | | |
| Acute leukemia | Winter | Meltzer 1989 [1] |
| Subclinical hypothyroidism | Winter | Aminzadeh 2010 [2] |
| Congenital hypothyroidism | Winter | Aminzadeh 2010 [2] |
| ADHD | Summer | Brookes 2008 [3] |
| Idiopathic inflammatory myopathy | August | Vegosen 2007 [4] |
| Atopic dermatitis | Autumn | Calov 2020& Tsuchida 2023 [5, 6] |
| Bronchiolitis | Autumn | Balekian 2016 [7] |
| Congenital inguinal hernia | Winter | Czeizel 1980 [8] |
| Hip joint development and morphology | Autumn | Zinchenko 2021 [9] |
| Congenital heart defects | Autumn | Dong 2019 [10] |
| Congenital hip dislocation | Autumn | ROBINSON 1968 [11] |
| Developmental dysplasia of the hip | Autumn | Sueyoshi 2016 [12] |
| Newborn hip dysplasia | Autumn | Sia 2024 [13] |
| Monosymptomatic nocturnal enuresis | Summer | Senturk 2018 [14] |
| Inconsistent with our result | | |
| Hand, foot, and mouth disease | April-July | Jiang 2024 [15] |
| Autoimmune hypothyroidism | Summer | Thvilum 2017 [16] |
| Newborn congenital adrenal hyperplasia | Winter | Pearce 2016 [17] |
| Severe acute malnutrition | Postharvest season and immediate pre‐planting season | Nonterah 2022 [18] |
| Total serum bilirubin | October-March | Iijima 2021 [19] |
| Specific speech articulation disorders | October–December | Ghezzo 2012 [20] |
| Learning disabilities | January-March | Mackay 2016 [21] |
| Bronchiolitis | Autumn | Balekian 2016 [7] |
| Asthma | Autumn | Almqvist 2020 [22] |
| Crohn’s disease | Spring | Shaw 2014 [23] |
| Ulcerative colitis | Summer | Bai 2009 [24] |
| Rotavirus diarrhea | Summer | Atchison 2009 [25] |
| Developmental dysplasia of the hip | September-January | Sueyoshi 2016 [12] |
| Graves’ hyperthyroidism | Males in Winter and females in Spring and Autumn or none | Iijima 2021 [19] |
| Hashimoto’s hyperthyroidism | Winter | Krassas 2007 [26] |

**Supplemental Fig. S1** The distribution of the number of patients visits. (a) the distribution of patient visits in different types of diseases with ICD-10 by SOBs. (b) complete number of visits in different type of diseases with ICD-10 by sex


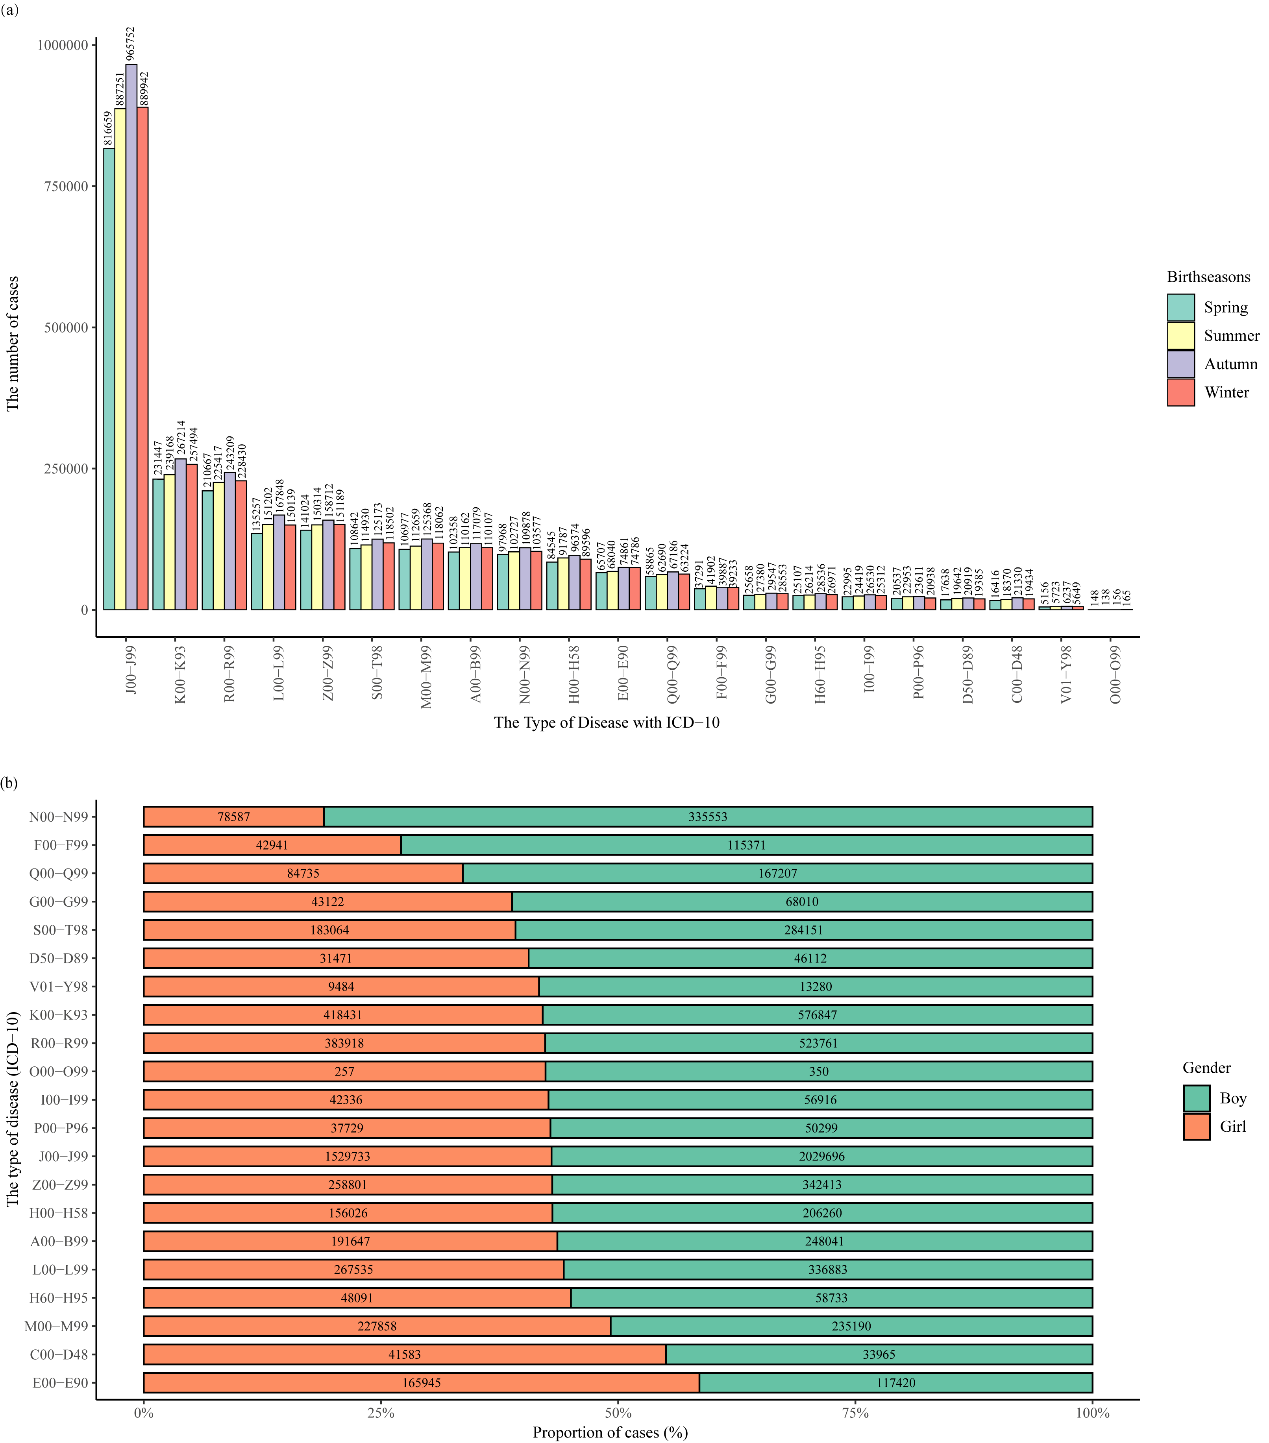


Reference

1. Meltzer AA, Spitz MR, Johnson CC, Culbert SJ: **Season-Of-Birth and Acute Leukemia of Infancy**. *Chronobiology International* 1989, **6**(3):285-289.

2. Aminzadeh M, Chomeili B, Riahi K, Dehdashtian M, Cheraghian B, Valavi E: **Effect of temperature changes on the occurrence of congenital hypothyroidism**. *J Med Screen* 2010, **17**(3):121-124.

3. Brookes KJ, Neale B, Xu X, Thapar A, Gill M, Langley K, Hawi Z, Mill J, Taylor E, Franke B *et al*: **Differential dopamine receptor D4 allele association with ADHD dependent of proband season of birth**. *Am J Med Genet B Neuropsychiatr Genet* 2008, **147B**(1):94-99.

4. Vegosen LJ, Weinberg CR, O'Hanlon TP, Targoff IN, Miller FW, Rider LG: **Seasonal birth patterns in myositis subgroups suggest an etiologic role of early environmental exposures**. *Arthritis Rheum* 2007, **56**(8):2719-2728.

5. Calov M, Alinaghi F, Hamann CR, Silverberg J, Egeberg A, Thyssen JP: **The Association Between Season of Birth and Atopic Dermatitis in the Northern Hemisphere: A Systematic Review and Meta-Analysis**. *J Allergy Clin Immunol Pract* 2020, **8**(2):674-680 e675.

6. Tsuchida A, Itazawa T, Matsumura K, Yokomichi H, Yamagata Z, Adachi Y, Inadera H, Japan E, Children's Study G: **Season of birth and atopic dermatitis in early infancy: results from the Japan Environment and Children's Study**. *BMC Pediatr* 2023, **23**(1):78.

7. Balekian DS, Linnemann RW, Castro VM, Perlis R, Thadhani R, Camargo CA, Jr.: **Pre-birth cohort study of atopic dermatitis and severe bronchiolitis during infancy**. *Pediatr Allergy Immunol* 2016, **27**(4):413-418.

8. Czeizel A: **Epidemiologic characteristics of congenital inguinal hernia**. *Helvetica paediatrica acta* 1980, **35**(1):57-67.

9. Zinchenko V, Kabatsii M, Hertsen I: **[CLINICAL DIAGNOSTICS OF DDH AND PECULIARITIES OF HIP JOINT DEVELOPMENT IN CHILDREN THROUGHOUT THE FIRST YEAR OF LIFE]**. *Georgian medical news* 2021(316-317):114-118.

10. Dong Y, Zhang Y, Tong S, Jiang Z, Xu Z, Li X, Wang W: **Analysis of the Seasonal Trend of Congenital Heart Defects**. *J Pediatr* 2019, **207**:29-33 e21.

11. ROBINSON GW: **BIRTH CHARACTERISTICS OF CHILDREN WITH CONGENITAL DISLOCATION OF THE HIP12**. *American Journal of Epidemiology* 1968, **87**(2):275-284.

12. Sueyoshi T, Ritter MA, Davis KE, Loder RT: **Seasonal variation in adult hip disease secondary to osteoarthritis and developmental dysplasia of the hip**. *World J Orthop* 2016, **7**(12):821-825.

13. Sia U, Chen HW, Lee WC, Kao HK, Yang WE, Chang CH: **Seasonal variation in newborn hip dysplasia: Unraveling the impact of weather on hip development**. *Pediatr Neonatol* 2024.

14. Senturk AB, Aydin C, Ekici M, Cakiroglu B, Sungur M, Baykam M: **Can Seasons be an Etiologic Factor for Monosymptomatic Nocturnal Enuresis?** *Cureus* 2018, **10**(5):e2580.

15. Jiang P, Yan X, Cai T, Huang L, Liu Z, Hao L, Huang T, Yang H, Xu M, Shi W *et al*: **Exploring the Birthday Week Effect on Hand, Foot, and Mouth Disease in Yunnan Province, China, From 2008 to 2022: Surveillance Data Analysis**. *JMIR Public Health and Surveillance* 2024, **10**:e59237-e59237.

16. Thvilum M, Brandt F, Brix TH, Hegedus L: **Month of birth is associated with the subsequent diagnosis of autoimmune hypothyroidism. A nationwide Danish register-based study**. *Clin Endocrinol (Oxf)* 2017, **87**(6):832-837.

17. Pearce M, Dauerer E, DiRienzo AG, Caggana M, Tavakoli NP: **The influence of seasonality and manufacturer kit lot changes on 17α-hydroxyprogesterone measurements and referral rates of congenital adrenal hyperplasia in newborns**. *European Journal of Pediatrics* 2016, **176**(1):121-129.

18. Nonterah EA, Welaga P, Chatio ST, Kehoe SH, Ofosu W, Ward KA, Godfrey KM, Oduro AR, Newell ML, as members of the Isg: **Children born during the hunger season are at a higher risk of severe acute malnutrition: Findings from a Guinea Sahelian ecological zone in Northern Ghana**. *Matern Child Nutr* 2022, **18**(2):e13313.

19. Iijima S, Baba T, Kondo M, Fujita T, Ohishi A: **Effects of Season of Birth and Meteorological Parameters on Serum Bilirubin Levels during the Early Neonatal Period: A Retrospective Chart Review**. *Int J Environ Res Public Health* 2021, **18**(5).

20. Ghezzo A, Chiappedi M, Ballerini A, Seragni G, Zanette M, Conti C, Stefanini MC, Ferrari-Ginevra O, Spelta P, Angelini L *et al*: **Specific language disorders and season of birth: underlying environmental factors or chance findings?** *J Clin Exp Neuropsychol* 2012, **34**(8):836-840.

21. Mackay DF, Smith GC, Cooper SA, Wood R, King A, Clark DN, Pell JP: **Month of Conception and Learning Disabilities: A Record-Linkage Study of 801,592 Children**. *Am J Epidemiol* 2016, **184**(7):485-493.

22. Almqvist C, Ekberg S, Rhedin S, Fang F, Fall T, Lundholm C: **Season of birth, childhood asthma and allergy in a nationwide cohort-Mediation through lower respiratory infections**. *Clin Exp Allergy* 2020, **50**(2):222-230.

23. Shaw SY, Nugent Z, Targownik LE, Singh H, Blanchard JF, Bernstein CN: **Association between spring season of birth and Crohn's disease**. *Clin Gastroenterol Hepatol* 2014, **12**(2):277-282.

24. Bai A, Guo Y, Shen Y, Xie Y, Zhu X, Lu N: **Seasonality in flares and months of births of patients with ulcerative colitis in a Chinese population**. *Dig Dis Sci* 2009, **54**(5):1094-1098.

25. Atchison CJ, Tam CC, Lopman BA: **Season of birth and risk of rotavirus diarrhoea in children aged <5 years**. *Epidemiol Infect* 2009, **137**(7):957-960.

26. Krassas GE, Tziomalos K, Pontikides N, Lewy H, Laron Z: **Seasonality of month of birth of patients with Graves' and Hashimoto's diseases differ from that in the general population**. *Eur J Endocrinol* 2007, **156**(6):631-636.
